# Supplementary material for: Historical overview and geographical distribution of neglected tropical diseases amenable to preventive chemotherapy in the Republic of the Congo: A systematic review
Source: PLOS journal article supplement (doi:10.1371/journal.pntd.0010560), 2022-07-11
Supplement: S4 (10.1371/journal.pntd.0010560.s004) [file journal.pntd.0010560.s004]

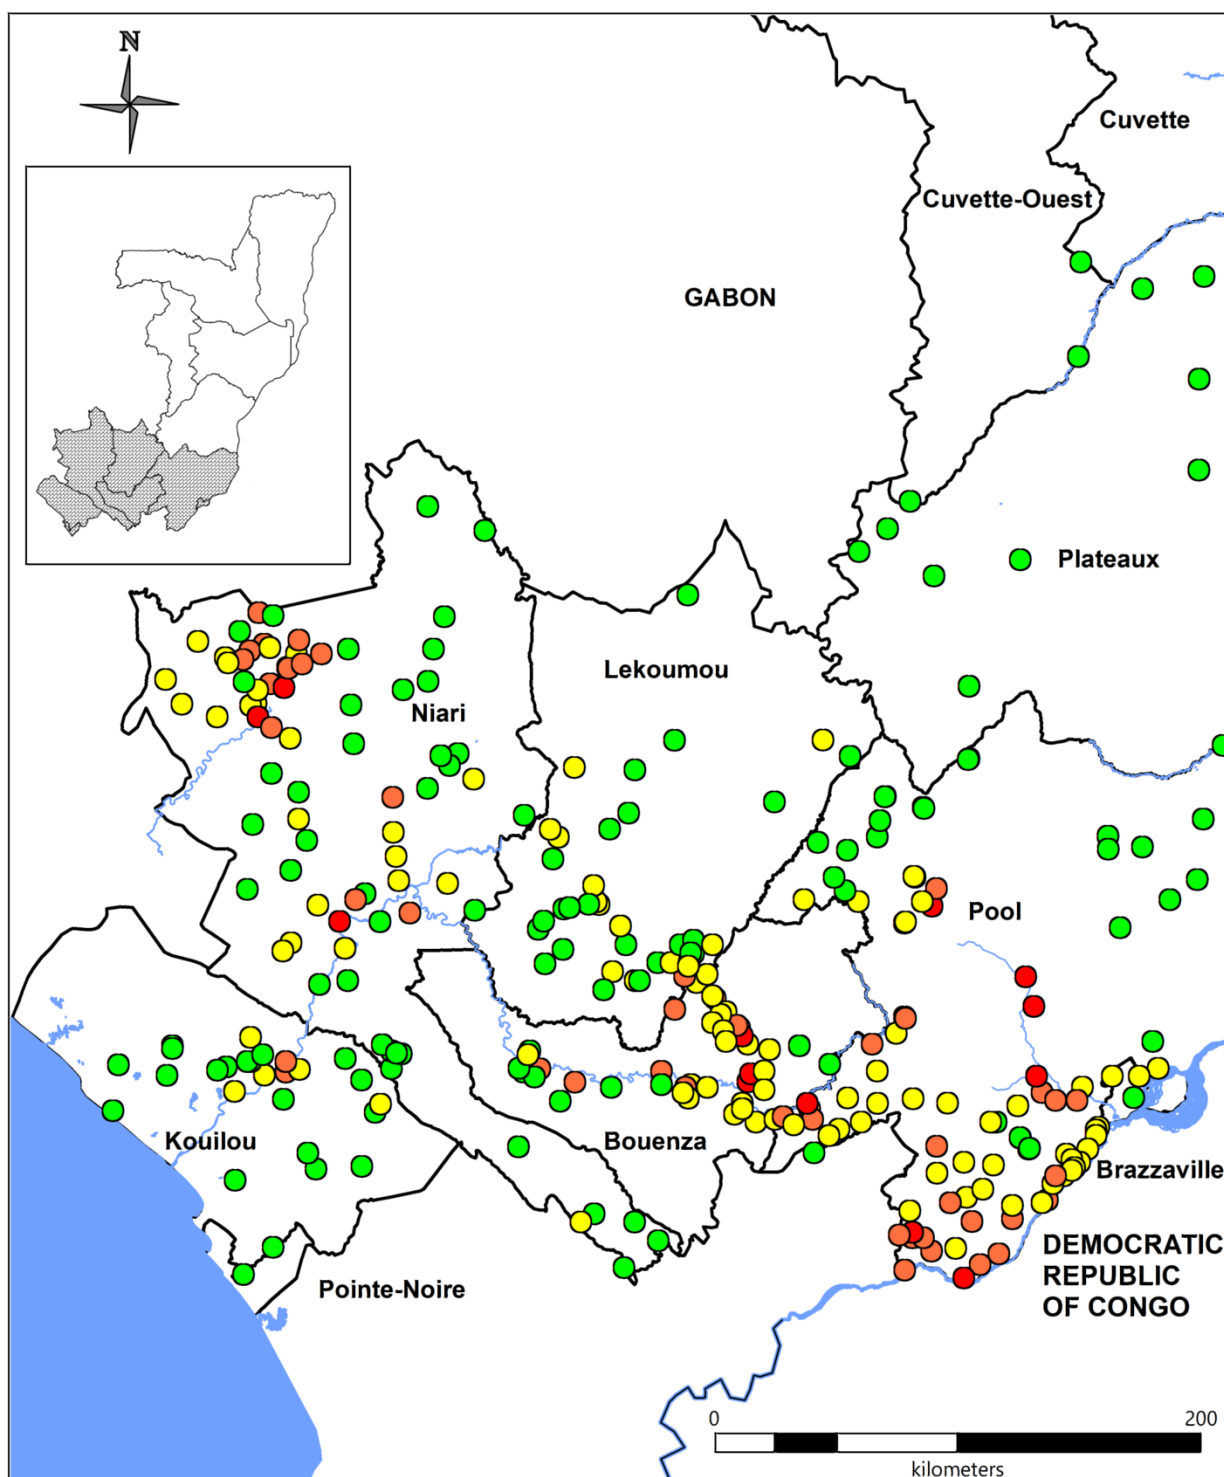

#### Administrative division

Departmental boundaries

#### Hydrography

River  
Atlantic Ocean

#### Prevalence of nodules (%)

REMO results

- Non-endemic : < 5
- Hypo-endemic : [5 - 20[
- Meso-endemic : [20 - 40[
- Hyper-endemic : >= 40

Niari = Department name

GABON = Border country name

Created by : Joseph A. Ngatse

Juin 2021
